# Supplementary material for: IndEcho study: cohort study investigating birth size, childhood growth and young adult cardiovascular risk factors as predictors of midlife myocardial structure and function in South Asians
Source: PubMed Central journal article supplement (PMC5898335; doi:10.1136/bmjopen-2017-019675), 2018-04-10
Supplement: bmjopen-2017-019675supp001.pdf [file bmjopen-2017-019675supp001.pdf]

**Supplementary table 1:** Total number of participants in Phase 1 and 2 of NDBC and VBC and reasons for lost to follow-up between both adult phases.

|                                                                          | <b>NDBC</b> | <b>VBC</b>  |
|--------------------------------------------------------------------------|-------------|-------------|
| <b>Phase-1</b>                                                           | (1998-2002) | (1998-2002) |
| Age (years)                                                              | 29.3 ± 1.0  | 28.3 ± 1.2  |
| Total (N)                                                                | 1,526       | 2,218       |
| Men (N)                                                                  | 886         | 1,161       |
| Women (N)                                                                | 640         | 1,057       |
| <b>Phase-2</b>                                                           | (2006-2009) | (2013-2014) |
| Age (years)                                                              | 36.1 ± 1.1  | 41.6 ± 1.0  |
| Total (N)                                                                | 1,100       | 1,080       |
| Men (N)                                                                  | 665         | 581         |
| Women (N)                                                                | 484         | 499         |
| <b>Numbers lost to follow-up between Phase 1 and Phase 2 and reasons</b> | 426         | 1,138       |
| Known deaths (N)                                                         | 18          | 62          |
| Known migration (N)                                                      | 88          | 50          |
| Unwilling to participate (N)                                             | 266         | 49          |
| Not traceable (N)                                                        | 54          | 21          |
| Funding restrictions (N)                                                 | 0           | 956         |

**Supplementary table 2:** Co-variables that will be studied to assess lifestyle and behavior in the IndEcho participants

| Exposure variable                             | Questionnaire                                                                                                                                                                                                                              | Variables included in the questionnaire                                                                                                                                                                                                                                                                                                                                                                                                                                                                          |
|-----------------------------------------------|--------------------------------------------------------------------------------------------------------------------------------------------------------------------------------------------------------------------------------------------|------------------------------------------------------------------------------------------------------------------------------------------------------------------------------------------------------------------------------------------------------------------------------------------------------------------------------------------------------------------------------------------------------------------------------------------------------------------------------------------------------------------|
| Socioeconomic status (SES) <sup>51-53</sup>   | The Government of India National Family Health Survey (NFHS-2) questionnaire and Standard of Living Index (SLI – IIPS,2000) questionnaire that contains 11 items to measure SES for both rural and urban populations of the entire country | Includes information on:<br>(i) Education<br>(ii) Occupation<br>(iii) Household characteristics (family type, number of persons)<br>(iv) SLI is a summary household measure composed of 11 items, including (a) house type (b) source of lighting (c) toilet facilities (d) main fuel for cooking (e) source of drinking water (f) separate room for cooking (g) ownership of house (h) ownership of agricultural land (i) ownership of irrigated land (j) ownership of livestock (k) ownership of durable goods |
| Physical activity (PA) <sup>54,55</sup>       | Global Physical Activity Questionnaire (GPAQ)                                                                                                                                                                                              | Includes questions related to three domains<br>(i) Activity at work and in leisure time (vigorous- and moderate-intensity activity)<br>(ii) Travel to and from places<br>(iii) Recreational activities (vigorous and moderate recreation) and sitting behavior                                                                                                                                                                                                                                                   |
| Smoking and alcohol consumption <sup>56</sup> | NFHS-2 Questionnaire                                                                                                                                                                                                                       | Duration and quantity/type of tobacco consumed, smoking habits and alcohol intake                                                                                                                                                                                                                                                                                                                                                                                                                                |
